# Supplementary material for: Live video from bystanders’ smartphones to medical dispatchers in real emergencies
Source: PubMed Central journal article supplement (PMC8419944; doi:10.1186/s12873-021-00493-5), 2021-09-06
Supplement: 12873_2021_493_MOESM1_ESM.pdf [file 12873_2021_493_MOESM1_ESM.pdf]

# Live video to the medical dispatcher

Survey text:

Please enter a questionnaire after each live video transmission attempt.

If you have any doubts about how a question should be understood, do not hesitate to contact me.

Gitte Linderoth

Email.XXX , Phonenumber XXX

(Questions with \* only appear in the electronic survey if relevant from the answer above.)

(Questions regarding cardiac arrest has been removed from the survey.)

---

Healthcare Professional (enter the number you have been assigned)

\_\_\_\_\_

---

Event ID from call (copy it here):

\_\_\_\_\_

---

Did the livestreaming succeed?

- Yes  
 No

---

\* Reason for NO video livestreaming?

- Bystander did not want live video  
 Patient did not want live video  
 Ambulance arrival  
 Technical challenges

---

\* Technical difficulties

- Caller does not receive SMS  
 Caller cannot activate the link  
 No video appeared on caller's phone  
 No video appeared on your screen, but you could see the GPS marker"  
 No video appeared and you could not see the GPS marker

---

How was the videoconnection?

- Good (No problems with the video connection)  
 Medium (e.g. the video sometimes lacked or froze)  
 Poor (e.g. the video was lacking or froze to a degree that made it almost useless)

---

Reporting type ("unconscious" is when the patient is currently unable to talk to you)

- Unconscious with normal breathing  
 Cardiac arrest  
 All other causes and feedback

---

\* Reason for the call (describe shortly)

---

\* Level of consciousness : BEFORE video (AVPU)

- A (The patient is awake)  
 V (The patient responds to verbal stimulation)  
 P (The patient responds to painful stimulation)  
 U (The patient is completely unresponsive)

\* Level of consciousness : AFTER video (AVPU)

- A (The patient is awake)  
 V (The patient responds to verbal stimulation)  
 P (The patient responds to painful stimulation)  
 U (The patient is completely unresponsive)

\* Was the patient's breathing patterns different from what you thought before the video?

- Yes, more trouble breathing  
 Yes, less trouble breathing  
 No  
 Do not know

\* How was the breathing more troubled?

- Fast respiration frequency  
 Obstructed airway  
 Prolonged expiration  
 Inspiratory stridor  
 Blue skin  
 Other  
 Do not know

Cooperation with caller

- No challenges  
 Challenges

\* Why was the cooperation with the bystanders challenging?

- Bystander emotionally stressed  
 Language barrier  
 Caller has difficulty following all instructions  
 Caller has barrier to filming  
 Other people present have a barrier to being filmed  
 Other

\* Describe why cooperation with bystanders was difficult

---

Did your perception of the patient's condition change after the live video transmission?

- No  
 Yes - patient is more critical ill than I thought  
 Yes - patient is less critical ill than I thought  
 Do not know

\* How was patient sicker than you thought before the live video?

---

\* How was patient less sick than you thought before the live video?

---

Did your perception of the environment or human resources change?

- Yes  
 No

\* How was your perception different? (Multiple selections are possible)

- More people present  
 Fewer people present  
 They took better care of the patient  
 They took less care of the patient  
 The surroundings were different  
 Other

\* How did they take better care of the patient?

\_\_\_\_\_

\* How did they take less care of the patient?

\_\_\_\_\_

\* How was the surrounding different?

\_\_\_\_\_

\* What was different than you thought before the video? (Describe briefly)

\_\_\_\_\_

Was the live video useful?

- Extremely useful  
 Very useful  
 Moderate useful  
 Slightly useful  
 Not at all useful

Did you recognize other or different disease/trauma after the live video?

- Yes  
 No  
 Do not know

\* What disease/trauma did you recognize after the video?

\_\_\_\_\_

Did the livestreaming of video change the help the patient received? (excluding changed emergency response)

- Yes - the patient received better help  
 Yes - the patient received worse help  
 No - the patient received the same help  
 Do not know

For example, positive- stopped bleeding, better patient position. For example, negative - filming removed focus from patient treatment

\* Why did the patient get better help after live video?

\_\_\_\_\_

\* Why did the patient get worse help after live video?

\_\_\_\_\_

Did you change the ambulance response after video?

- No change  
 Upgrade  
 Downgrade

General comments and reflections

\_\_\_\_\_
